# Supplementary material for: Plasmodium infection disrupts the T follicular helper cell response to heterologous immunization
Source: eLife. 2023 Jan 30;12:e83330. doi: 10.7554/eLife.83330 (PMC9886276; doi:10.7554/eLife.83330)
Supplement: Figure 1—source data 1. [file elife-83330-fig1-data1.xlsx]

## Sheet: Figure 1
Figure 1C								Figure 1D								Supplemental Fig 1B						Supplemental Fig 1C				Supplemental Fig 1D
+iRBCs			+nRBCs					+iRBCs			+nRBCs
cDC-iRBC	B cells-iRBC	RPMs-iRBC	cDC-nRBc	B cells-nRBC	RPMs-nRBC			cDC	B cells	RPMs	cDC	B cells	RPMs			B6 infected	MD4 infected	B6 naive	MD4 naive			RPM: CD45.1	RPM: CD45.2			B cell: CD45.1	B cell: CD45.2
12.1	31.2	41.6	16.1	5.53	57.1			0.012	0.0341	0.042	0.00374	0.01345	0.00597			3.99	3.58	0.86	0.75			12.8	79.5			52.1	47.7
13.3	26.2	43.4	9.39	9.86	53.5			0.013	0.02765	0.043	0.0035	0.0119	0.00712			4.91	4.41	0.99	0.83			9.09	89.1			46.4	52.6
8.06	39.8	33	11.2	13.3	44.7			0.00461	0.02483	0.019	0.00132	0.0056	0.00751			3.92	3.48	0.72	0.59
6.96	46.3	21.1	17.5	24.3	28			0.003	0.02128	0.00907	0.00154	0.00629	0.00614			4	3.63	0.86	0.79			19	77.6			46.4	52.5
			19.9	19.9	40.4													1.15	0.8			20.9	74.4			35.7	62.1
																		1.23	0.9
1.17	45.4	29.4	6.74	22.2	42.3													1.18	0.83
1.26	45.4	30.3	8.4	15	41.7			0.000688	0.01333	0.014	0.000444	0.00461	0.00333					0.93	0.67
								0.000741	0.013365	0.00644	0.000304	0.00437	0.000973
2.11	36.1	41.8	0	24.8	12			0.000182	0.01527	0.00109	0	0.00512	0.00183			3.12		0.65
2.65	48	23.1	5.5	20.2	41.3											3.13		0.56
1.08	61.7	6.5	7.69	43.1	24.6				0.016			0.00447						0.26
									0.013			0.00321						0.19
1.52	61.5	9.13	22.6	29	38.7													0.19
1.16	43.1	40.8	0	15.4	71.8			0	0.0104	0.00644	0	0.00313	0.000784
3.56	54.2	24.3	2.56	38.5	10.3			0.000152	0.0114	0.015	7.59e-05	0.00221	0.00365			3.74		1.25
			4.88	22	31.7			0.000435	0.0159	0.036	0.000109	0.00435	0.005			3.61		1.11
								0.00101	0.0213	0.047	0	0.00321	0.00358			3.28
																3.64
																4.33		1.03
																4.32		0.8
																4.82		0.79
																3.89		0.72
																4.07		0.65
																4.22		0.7
																3.67	3.26	0.95	1.03
																3.53	3.71	1.04	1.07
																3.45	3.51	1.11	1.13
