# Supplementary material for: Plasmodium infection disrupts the T follicular helper cell response to heterologous immunization
Source: eLife. 2023 Jan 30;12:e83330. doi: 10.7554/eLife.83330 (PMC9886276; doi:10.7554/eLife.83330)
Supplement: Figure 2—source data 1. [file elife-83330-fig2-data1.xlsx]

## Sheet: Figure 2
Figure 2B
	cDC					B cell					RPMs
iRBC	1.53	4.81	1.74	1.57	1.11	64.9	55.8	60.4	46.9	52.7	15.3	13.5	10.4	30.8	25.3
PE	8.42	7.55	6.81	11.9	9.29	73	72.6	78.8	75.5	72.1	5.14	6.15	4.2	3.1	6.59
Figure 2D
B-RBC	B-PE	RPM-RBC	RPM-PE
0.015	0.79	0.56	4.88
0.011	0.68	0.44	3.73
0.013	0.91	0.57	5.4
0.094	0.44	3.95	1.15
0.11	0.49	2.2	1.91
Figure 2E
DC	B cells	RPMs
5.50327	1.12481	0.335948
1.56965	1.30108	0.455556
3.91379	1.30464	0.403846
7.57962	1.60981	0.100649
8.36937	1.36812	0.260474
