# Supplementary material for: Plasmodium infection disrupts the T follicular helper cell response to heterologous immunization
Source: eLife. 2023 Jan 30;12:e83330. doi: 10.7554/eLife.83330 (PMC9886276; doi:10.7554/eLife.83330)
Supplement: Figure 3—source data 1. [file elife-83330-fig3-data1.xlsx]

## Sheet: Figure 3
Figure 3A						Figure 3B				Figure 3C			Figure 3D
Day	mouse 1	mouse 2	mouse 3			naive	Pc D5			naive	Pc D5		naive	Pc D5
5	16.6023	11.6343	22.6087			43236	60228.1			104.2	3014.01		21765.5	19317.6
6	30.8357	36.7403	40.6316			54930.8	79507.2			176.05	2539.5		34001.9	29854.8
7	33.6384	17.1123	27.8523
8	20.3448					122149	120896			45.186	18771
11						96504.2	145846			96.8858	14198.4		22057.7	109800
12	1.97183	0.852878				190414							26840.8	43824.1
13	4.42	2.26	3.36							322.031	284.346
15	1.4245	1.75439	0.079936			104324	161905			495.891	1318.81		18196	58958
16	0.039984	0	0.0749438			213849	215405						23829	62731.4
23	0.009999	0.019996	0
						93995.1	42532.2
						76049.6	45124
						93229.9
Figure 3F
	convDC							moDC
Total naive	98.9	97.8	99.1	98.9	99.1	93	95.9	0.45	1.04	0.45	0.55	0.37	4.32	2.47
PE+ naive	100	89.3	100	92.3	100			0	0	0	0	7.69
Total Pc	69.4	83.5		53.3	53	66.3	52.9	28.3	14.2		43.7	45	30.7	43.7
PE+ Pc	16.7	36		2.77	0.75			81	60.9		96	98.9
Figure 3G-MHCII					Figure 3G- CD80					Figure 3G- CD86
cDC		moDC			cDC		moDC			cDC		moDC
naive	Pc D5	Pc D5			naive	Pc D5	Pc D5			naive	Pc D5	Pc D5-moDC
7612	2558	8171			703	807	1788			475	1555	2697
6689	2655	8716			817	663	1994			396	1512	2992
17286	6080	10723			831	839	1195			540	1000	2152
20327	4643	9301			849	647	992			574	860	2072
15206					824					541
9951	4281	6294			846	1051	1658			1138	1825	4425
9884	3525	6545			830	966	1594			948	1600	3870
					842	750	1232
6545	4518	14184			800	494	1459			1028	2193	2686
6631	3413	10995			929					978	1972	2583
4290										1141
