# Supplementary material for: Plasmodium infection disrupts the T follicular helper cell response to heterologous immunization
Source: eLife. 2023 Jan 30;12:e83330. doi: 10.7554/eLife.83330 (PMC9886276; doi:10.7554/eLife.83330)
Supplement: Figure 4—source data 1. [file elife-83330-fig4-data1.xlsx]

## Sheet: Figure 4
Figure 4B						Figure 4D						Figure 4E				Figure 4F			Figure 4G				Figure 4I				Figure 4J
						Tfh		all Cxcr5+																			Tfh		all Cxcr5+
naive	GP immunized	PcD5-GPimm	Pc- no GP			GP immunized	PcD5-GPimm	GP immunized	PcD5-GPimm			D23 GP	D23 GP+Pc			D23 GP	D23 GP+Pc		D23 GP	D23 GP+Pc			IR-Py	Pc+IR-Py			IR-PyGP66	PcD5-IRPyGP66	IR-PyGP66	PcD5-IRPyGP66
66.9075	5944.1	1363.18	165.382			3.7	1.65	22.9	18.15			102116	226711			4.13	2.68		1040.74	28.7293			1861.94	663.106			2.23	1.38	52.83	9.66
	11306.3	6676.95	116.595			8.85	0.44	33.95	11.04			46490	56442			5.52	0.78		32.4642	54.9864			1238.52	465.839			4.97	2.8	50.67	7.47
													61590				1.69		511.768	143.071				290.012				1.35		10.81
								44.2	1.08				50596				0.092
121.188	2357.08	2202.98						44.4	1.45																		15.1	0	54.6	15.5
116.595	4688.17	5514.46				32.8	0.18	36.1	0.37			9224.52	17955.8			11.3	0.16		4217.4	6075.84
	4375.6	2085.93				26.7	0.51					205.47	11953.6			15.8	0.46		2566.25	440.248			831.446	103.019			15.9	0	35.9	15.76
						15.6	0	25.1	9.32			21593.6	89505.7			2.37	0.16			1040.87			965.472	240.554			32.2	12.5	42.5	11.36
								30.1	11.5											46.5483				299.483				0		30.76
137.745	9866.41	6792.24				2.61	0.23
	12805.3	849.824				10.3	1.71
								34.97	2.69
70.6298								41.3	2.04
						26.3	1.46	34.9
83.647	3265.83	3885.11				31.3	0.73
	11740.3	5586.65				24.8
	6784.6	4147.6
		4720.78
		7484.97
17.3067
