# Supplementary material for: Plasmodium infection disrupts the T follicular helper cell response to heterologous immunization
Source: eLife. 2023 Jan 30;12:e83330. doi: 10.7554/eLife.83330 (PMC9886276; doi:10.7554/eLife.83330)
Supplement: Figure 5—source data 1. [file elife-83330-fig5-data1.xlsx]

## Sheet: Figure 5
Figure 5B					Figure 5C				Figure 5D
naive	GP immunized	PcD5-GPimm			GP immunized	PcD5-GPimm			GP immunized	PcD5-GPimm
17700	41300	10300			2.5	9.56			55.1	3.71
	78200	33400			7.62	4.05			36.9	1.64
					1.73	3.4
13200	49800	2750			2.15	0.93			41.4	9.89
	72200	14800			1.09				45.2	0.86
					2.49	3.96			53.6	18.9
20885.4	63218.8	18676.4			2.87	1.61			54.6	7.43
	79517.8	9651.63							52.9
	77990.3
Figure 5E
	naive D7									Pc D7
1	1.45975	1.26875	0.92475	1.8775	2.0665	2.0525	1.9185	1.9505		0.79175	0.30175	0.25275	1.5845	1.1695	1.2425	0.8015	1.3835
2	1.14775	1.10175	1.10475	1.5665	1.8255	1.9135	1.9115	1.7025		0.38975	0.24775	0.05075	1.0285	0.6375	0.6995	0.1815	0.5095
3	0.55575	0.83875	0.58475	0.8735	1.4015		1.2755	0.9545		0.00975	0.00275	-0.01425	0.2235	0.1255	0.1455	0.0615	0.1785
4	0.28075	0.49475	0.29775	-0.0025	0.2495		0.1135	0.1035		-0.03025	-0.02725	-0.01225	-0.0115	-0.0175	0.0015	0.0175	0.0535
Figure 5F
naive D0	Pc D0	naive D7	Pc D7	naive D14	Pc D14	naive D23	Pc D23
0.02095	0.211	2.574	0.7917		2.526		2.53
0.2903	0.1323	2.822	0.4001	3.827	2.901	3.194	2.887
	0.3159	2.301	0.1716	3.273	2.79	3.234	2.309
0.2679		3.378	2.039	3.923	2.981	4.323	3.772
		4.385	1.34	4.454	2.15	4.975	2.539
		4.203	1.467		2.314		3.434
		3.684	0.6525
			1.407
